# Supplementary material
Source: PubMed Central journal article supplement (PMC3406113)

**Supplementary Figure:**

**Fig. S1.** The inducible expression of the *upp* gene in *C. glutamicum*. The *upp*-null *C. glutamicum* mutant strain was used as the parental strain for the inducible expression of the *upp* gene from the vector pWYE1088. (A) CGX agar plate containing 5-FU (20  $\mu$ M); (B) CGX agar plate containing 5-FU (20  $\mu$ M) and 0.02% L-arabinose.

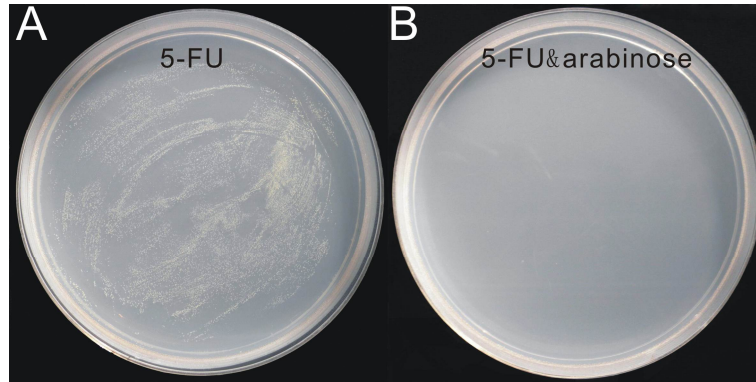

Supplement: AEM.01147-12_zam999103543so1.pdf [file AEM.01147-12_zam999103543so1.pdf]
